# Supplementary material
Source: PubMed Central journal article supplement (PMC9455619)
Supplement: NIHMS1778782-supplement-SIAP_Supplement.pdf [file NIHMS1778782-supplement-SIAP_Supplement.pdf]

855 **S1. Supplement.**

856 **S1.1. Derivation of formulas for  $\theta_s$  and  $B_s$ .** The mass density of oligomers  
857 in the sol is  $\theta_s(\mathbf{x}, t) = \sum_{m,b} (m + 2b)c_{mb}$ . Recall that  $g(\mathbf{x}, t, y, z) = \sum_{m,b} y^m z^{b+2} c_{mb}$ .  
858 By computing the appropriate derivatives of  $g$ , it is immediate that  $\theta_s = (g_y + 2g_z -$   
859  $4g)|_{y=z=1}$ . From the definition of  $\tilde{W}$ , we have that  $g_z = zR - \tilde{W}$ . Integrating this  
860 from  $z = 0$  to  $z = 1$  and noting that  $g(\mathbf{x}, t, y, z = 0) = 0$ , we obtain

$$861 \quad g(\mathbf{x}, t, y, 1) = \frac{R}{2} - \int_0^1 \tilde{W}(\mathbf{x}, t, y, z') dz',$$

862 and from this it follows that  $g_y(\mathbf{x}, t, y, 1) = -\int_0^1 \tilde{W}_y(\mathbf{x}, t, y, z') dz'$ . Recalling that  
863  $W_y(\mathbf{x}, t, 1, z) = V(\mathbf{x}, t, z)$ , this yields  $g_y(\mathbf{x}, t, 1, 1) = -\int_0^1 V(\mathbf{x}, t, z') dz'$ . Since also  
864  $W(\mathbf{x}, t, z) = \tilde{W}(\mathbf{x}, t, 1, z)$ , we have that

$$865 \quad \theta_s(\mathbf{x}, t) = -\int_0^1 V(\mathbf{x}, t, z') dz' + (2R - 2W(\mathbf{x}, t, 1)) - 4\left(\frac{R}{2} - \int_0^1 W(\mathbf{x}, t, z') dz'\right)$$

$$866 \quad = 4\int_0^1 W(\mathbf{x}, t, z') dz' - 2W(\mathbf{x}, t, 1) - \int_0^1 V(\mathbf{x}, t, z') dz'.$$

867 The concentration of branches on soluble oligomers is  $B_s(\mathbf{x}, t) = \sum_{m,b} b c_{mb}$ .  
868 This is the same as  $B_s(\mathbf{x}, t) = g_z(\mathbf{x}, t, 1, 1) - 2g(\mathbf{x}, t, 1, 1)$ . Since  $g_z(\mathbf{x}, t, y, z) =$   
869  $zR(\mathbf{x}, t) - \tilde{W}(\mathbf{x}, t, y, z)$ , we have  $g_z(\mathbf{x}, t, 1, 1) = R(\mathbf{x}, t) - \tilde{W}(\mathbf{x}, t, 1, 1) = R(\mathbf{x}, t) -$   
870  $W(\mathbf{x}, t, 1)$ . As noted above,  $g(\mathbf{x}, t, 1, 1) = \frac{R}{2} - \int_0^1 W(\mathbf{x}, t, z') dz'$ . Hence,  $B_s(\mathbf{x}, t) =$   
871  $2\int_0^1 W(\mathbf{x}, t, z') dz' - W(\mathbf{x}, t, 1)$ .

872 **S1.2. Diffusion of monomer.** Suppose monomer diffuses with diffusion coef-  
873 ficient  $D_1$ . Then, the monomer concentration  $c_{10}$  evolves according to the equation

$$874 \quad (S1.1) \quad (c_{10})_t = \nabla \cdot (D_1 \nabla c_{10}) - 2k_l c_{10} R - k_b c_{10} (R^2 - R_g^2) + S_{10}.$$

875 Writing  $\nabla \cdot (D_1 \nabla c_{10}) = \nabla \cdot (D \nabla c_{10}) + \nabla \cdot ((D_1 - D) \nabla c_{10})$ , we find that the partial dif-  
876 ferential equation for  $g$  is modified by the addition of the term  $\{\nabla \cdot ((D_1 - D) \nabla c_{10})\} y z^2$   
877 on the right hand side, and that for  $R$  by the addition of the term  $2\nabla \cdot ((D_1 - D) \nabla c_{10})$ .  
878 Consequently, the equations for  $\tilde{W} = zR - g_z$  and  $\tilde{W}_y$  are modified, respectively, by  
879 the addition of terms  $2z(1 - y) \nabla \cdot ((D_1 - D) \nabla c_{10})$  and  $-2z \nabla \cdot ((D_1 - D) \nabla c_{10})$ . Hence,  
880 the equations for  $W$ ,  $V$ , and  $R$  are modified, respectively, by the addition of terms  
881  $0$ ,  $-2z \nabla \cdot ((D_1 - D) \nabla c_{10})$ , and  $2\nabla \cdot ((D_1 - D) \nabla c_{10})$ . Similarly, an additional term  
882  $\nabla \cdot ((D_1 - D) \nabla c_{10})$  appears on the right hand side of the equation for  $\theta$ .

883 **S1.3. Relation between  $R_g$  and  $B_g$ .** We can write the equations for  $W$  and  
884  $B$  in the form

$$885 \quad W_t = \nabla \cdot (D \nabla (W - zR_g)) - F_z + r^W,$$

$$886 \quad B_t = \nabla \cdot (D \nabla B_s) + r^B,$$

887 where

$$888 \quad F(z, \mathbf{x}, t) = k_l \frac{W^2}{2} + k_b \left( \frac{1}{6} (zR - W)^3 - \frac{1}{2} (R^2 - R_g^2) z (zR - W) \right),$$

$$889 \quad r^W(z, \mathbf{x}, t) = k_l z R_g^2 - k_b \frac{z}{2} \left( R^3 - (3R_s R_g^2 + R_g^3) \right),$$

890

$$\begin{aligned}
891 \quad r^B(\mathbf{x}, t) &= k_b \frac{1}{6} \left( R^3 - (3R_s R_g^2 + R_g^3) \right), \\
892 \quad R_g(\mathbf{x}, t) &= W(\mathbf{x}, t, 1), \quad R_s(\mathbf{x}, t) = R - R_g, \\
893 \quad B_s(\mathbf{x}, t) &= 2 \int_0^1 W(\mathbf{x}, t, z') dz' - R_g, \quad B_g(\mathbf{x}, t) = B - B_s.
\end{aligned}$$

894 Note that

$$895 \quad B_g(\mathbf{x}, t) = B(\mathbf{x}, t) - 2 \int_0^1 W(\mathbf{x}, t, z') dz' + R_g(\mathbf{x}, t).$$

896 and that  $B_g(\mathbf{x}, t) = R_g(\mathbf{x}, t) = 0$  for  $t < t_{gel}^-$ , so  $B(\mathbf{x}, t) - 2 \int_0^1 W(\mathbf{x}, t, z') dz' = 0$   
897 for all such  $t$  and for all  $\mathbf{x}$ . If  $B(\mathbf{x}, t) - 2 \int_0^1 W(\mathbf{x}, t, z') dz' = 0$  for all  $t \geq t_{gel}$ , then  
898  $B_g(\mathbf{x}, t) = R_g(\mathbf{x}, t)$  for all  $t$ . So we consider,

$$899 \quad \frac{\partial}{\partial t} \left( B(\mathbf{x}, t) - 2 \int_0^1 W(\mathbf{x}, t, z') dz' \right).$$

900 Using the equations above, we find that,

$$901 \quad \frac{\partial}{\partial t} B(\mathbf{x}, t) = \nabla \cdot \left( D \nabla \left( 2 \int_0^1 W(\mathbf{x}, t, z') dz' - R_g(\mathbf{x}, t) \right) \right) + r^B(\mathbf{x}, t),$$

902 and

$$\begin{aligned}
903 \quad \frac{\partial}{\partial t} \left( \int_0^1 W(\mathbf{x}, t, z') dz' \right) &= -F(1, \mathbf{x}, t) + F(0, \mathbf{x}, t) + \int_0^1 r^W(\mathbf{x}, t, z') dz' \\
904 \quad &+ \nabla \cdot \left( D \nabla \left( \int_0^1 W(\mathbf{x}, t, z') dz' - \frac{1}{2} R_g(\mathbf{x}, t) \right) \right).
\end{aligned}$$

905 Using these last two equations and after some algebra,

$$906 \quad \frac{\partial}{\partial t} \left( B(\mathbf{x}, t) - 2 \int_0^1 W(\mathbf{x}, t, z') dz' \right) = r^B(\mathbf{x}, t) + 2F(1, \mathbf{x}, t) - 2 \int_0^1 r^W(\mathbf{x}, t, z') dz' = 0,$$

907 and consequently  $B_g(\mathbf{x}, t) \equiv R_g(\mathbf{x}, t)$ .

908 **S1.4. Boundary Conditions.** We assume that  $c_{mb}$  satisfies the boundary con-  
909 ditions

$$910 \quad (\text{S1.2}) \quad -D\mathbf{n} \cdot \nabla c_{mb}(\mathbf{x}, t) = F_{10}(\mathbf{x}, t) \delta_{m1} \delta_{b0}.$$

911 Using these conditions and the definition of  $g(\mathbf{x}, t, z, y)$ , we see that

$$912 \quad -D\mathbf{n} \cdot \nabla g(\mathbf{x}, t, y, z) = F_{10}(\mathbf{x}, t) y z^2 \quad \text{and} \quad -D\mathbf{n} \cdot \nabla g_z(\mathbf{x}, t, y, z) = 2F_{10}(\mathbf{x}, t) y z.$$

913 Recalling that  $R_s(\mathbf{x}, t) = g_z(\mathbf{x}, t, 1, 1)$ , we deduce that  $R_s$  satisfies the condition

$$914 \quad (\text{S1.3}) \quad -D\mathbf{n} \cdot \nabla R_s(\mathbf{x}, t) = 2F_{10}(\mathbf{x}, t),$$

915 which is consistent with the fact that each monomer has two reactive sites. Since  
916  $R = R_s + R_g$ , it follows that

$$917 \quad (\text{S1.4}) \quad -D\mathbf{n} \cdot \nabla R(\mathbf{x}, t) = 2F_{10}(\mathbf{x}, t) - D\mathbf{n} \cdot \nabla R_g.$$

918 Because reactive sites on the gel do not move, the term  $-D\nabla R_g$  should *not* be thought  
 919 of as the diffusive flux of gel reactive sites, but instead as the quantity needed to  
 920 account for the inclusion of  $R_g$  in  $R$  on the left-hand side of Eq. 2.34. Using the  
 921 definition  $\tilde{W}(\mathbf{x}, t, y, z) = zR(\mathbf{x}, t) - g_z(\mathbf{x}, t, y, z)$ , and the boundary conditions just  
 922 derived we find that

$$923 \quad -D\mathbf{n} \cdot \nabla \tilde{W}(\mathbf{x}, t, y, z) = 2F_{10}(\mathbf{x}, t)z(1-y) - zD\mathbf{n} \cdot \nabla R_g(\mathbf{x}, t),$$

$$924 \quad -D\mathbf{n} \cdot \nabla \tilde{W}_y(\mathbf{x}, t, y, z) = -2F_{10}(\mathbf{x}, t)z.$$

925 It follows that

$$926 \quad (\text{S1.5}) \quad -D\mathbf{n} \cdot \nabla W(\mathbf{x}, t, z) = -D\mathbf{n} \cdot \nabla R_g(\mathbf{x}, t) \quad \text{and} \quad -D\mathbf{n} \cdot \nabla V(\mathbf{x}, t, z) = -2F_{10}(\mathbf{x}, t).$$

927 Using Eqs. 2.27-2.28 and Eq. S1.5, we find that

$$928 \quad (\text{S1.6}) \quad -D\mathbf{n} \cdot \nabla \theta_s(\mathbf{x}, t) = F_{10}(\mathbf{x}, t) \quad \text{and} \quad -D\mathbf{n} \cdot \nabla B_s(\mathbf{x}, t) = 0.$$

929 We note that the boundary conditions in Eqs. 2.36 hold automatically for  $\theta_s$  and  
 930  $B_s$  calculated from (2.27-2.28), but it is important to make explicit use of them in  
 931 discretizing the terms  $D\Delta\theta_s$  and  $D\Delta B_s$  in the PDEs 2.31 and 2.32, respectively. In  
 932 order to determine the monomer distribution  $c_{10}$ , we also solve the  $m = 1$ ,  $b = 0$   
 933 instance of Eqs. 2.18 and 2.33.

934 **S1.5. Numerical solution of the PDEs.** Consider our equations

$$935 \quad W_t = D(W - zW|_{z=1})_{xx}$$

$$936 \quad - \left\{ \frac{k_l}{2}W^2 + \frac{k_b}{6}(zR - W)^3 - \frac{k_b}{2}(R^2 - R_g^2)(z^2R - zW) \right\}_z$$

$$937 \quad + k_l z R_g^2 - \frac{k_b}{2}z \left( R^3 - (3R_s R_g^2 + R_g^3) \right).$$

$$938 \quad R_t = D(R_s)_{xx} - k_l (R^2 - R_g^2) - \frac{k_b}{2} \left( R^3 - (3R_s R_g^2 + R_g^3) \right) + 2S_{10}.$$

939 Recalling that  $R_g = W|_{z=1}$  and  $R_s = R - R_g$ , these equations have the form:

$$940 \quad W_t = -(F(W, R))_z + D(W - zW|_{z=1})_{xx} + r^W(W, R),$$

$$941 \quad R_t = D(R_s)_{xx} + r^R(W, R).$$

942 To solve these equations numerically, we use a fractional step approach, first updating  
 943  $W$  and  $R$  to account for transport in  $z$  and for the reactions terms  $r^W(W, R)$  and  
 944  $r^R(W, R)$ , and then updating them to account for diffusion in  $x$ . For the diffusion  
 945 term, we discretize in  $x$  using a uniform grid and the usual three-point approximation  
 946 to the second derivative within a Crank-Nicolson scheme. For the reaction terms  
 947  $r^W(W, R)$  and  $r^R(W, R)$ , we use an explicit two-stage Runge-Kutta scheme.

948 For the transport in  $z$  terms in the  $W$  PDE, we have to contend with the fact that  
 949  $W_z$  develops a singularity at  $z = 1$  at time  $t = t_{gel}$ , while it is smooth for  $0 \leq z < 1$   
 950 for all  $t$ , and the branch starting from  $z = 0$  is smooth for  $0 \leq z \leq 1$  for  $t < t_{gel}$  and  
 951  $t > t_{gel}$ . We do not have a boundary condition for  $W$  at  $z = 1$ . For these reasons,  
 952 we introduce a grid with much finer spacing close to  $z = 1$ , and for each point on this  
 953 grid, we use a blend of the upwind Beam-Warming (BW) scheme and the centered  
 954 Lax-Wendroff (LW) scheme. The blend is  $z$ -dependent, reducing to the BW scheme

955 close to  $z = 1$  and to the LW scheme close to  $z = 0$ , where we do have a boundary  
 956 condition for  $W$ .

957 For an equation  $W_t = F(W)_z$ , both the BW and LW schemes are based on the  
 958 expansion

$$959 \quad (\text{S1.7}) \quad W(t+k, z) = W(t, z) - F(W)_z k + (((F'(W))^2 W_z)_z) k^2 / 2 + O(k^3).$$

960 For the BW scheme, we approximate  $F(W)_z$  at  $z_j$  with a one-sided second order  
 961 finite-difference quotient and we approximate  $((F'(W))^2 W_z)_z$  at  $z_j$  with the usual  
 962 approximation to a variable-coefficient diffusion term, but evaluated at  $z_{j-1}$  rather  
 963 than  $z_j$ . This introduces an  $O(h)$  error for this quantity, but it is multiplied by  $k^2$ ,  
 964 and so the overall scheme is still second-order. For the LW scheme, we use a centered-  
 965 difference approximation to  $F(W)_z$  at  $z_j$  and the same approximation to the variable  
 966 coefficient diffusion term as for BW but evaluated at  $z_j$ . More details about the  
 967 numerical method can be found in [10].

968 **S1.6. On the  $R_s$  steady-state assumption.** We examine the origin of the gap  
 969 in Fig. 10b, between the blue dashed line and the asymptotic limits of the colored  
 970 curves as  $k_b \rightarrow \infty$ . According to the exact relationship Eq. 3.11,  $f^A$  is given by

$$971 \quad (\text{S1.8}) \quad f^A = \frac{2}{1 - \frac{B_s}{R_s}}.$$

972 In calculating the height of the dashed line, we use this formula but make the as-  
 973 sumption that  $R_s = r_{ss}$  is in steady-state, where  $r_{ss}$  satisfies Eq. 3.5 and we use an  
 974 asymptotic value of  $r_{ss}$  to determine  $B_s(t_{gel})$  using Eq. 3.9 for use in the Eq. 3.11.  
 975 Fig. S1a shows the same colored curves as in Fig. 10b, as well as black dashed curves  
 976 calculated from Eq. 3.11 using a numerical solution of Eq. 3.5. The black curves  
 977 asymptote to the blue dashed line, so the use of the asymptotic value for  $r_{ss}$  is not  
 978 the primary reason for the gap. In Fig. S1b we plot curves  $R_s(t)$  vs  $t$  for a range of  
 979 source rates  $S_{10}$  and branching rates  $k_b$ . Each curve ends at the time at which gelation  
 980 occurs for the corresponding  $S_{10}$ ,  $k_b$  pair. The ends of the curves are indicated by  
 981 dots and the dot corresponding to the smallest value of  $k_b$  appears at the right end  
 982 of each curve. For all source rates,  $S_{10}$ , steady state is attained by gel time for some  
 983 of the smaller branching rate values. For  $S_{10} = 10^{-5}$  steady state is attained for  $k_b$   
 984 between  $10^{-5}$  and  $10^1$ . For the  $S_{10} = 10^5$ , steady state is attained only for  $k_b$  between  
 985  $10^{-5}$  and  $10^{-3}$ . Furthermore, the gap between  $R_s(t_{gel})$  and the steady-state value is  
 986 large, in particular for large values of  $S_{10}$  and  $k_b$ .

987 **S1.7. Showing that  $f^A \rightarrow 3$ .** Our numerical evidence suggests that  $f^A(t) =$   
 988  $R(t)/M_{00}(t) \rightarrow 3$  as  $t \rightarrow t_{gel}$  if only monomers are present initially and there is no  
 989 additional source of monomers. Here, we show that this must be the case. The key  
 990 equations are

$$991 \quad (\text{S1.9}) \quad \frac{dR}{dt} = -k_l R^2 - \frac{k_b}{2} R^3,$$

992

$$993 \quad (\text{S1.10}) \quad \frac{dY}{dt} = k_l Y^2 + k_b R \left( \frac{1}{2} R^2 + RY + Y^2 \right),$$

994 and

$$995 \quad (\text{S1.11}) \quad \frac{dM_{00}}{dt} = -\frac{k_l}{2} R^2 - \frac{k_b}{3} R^3$$

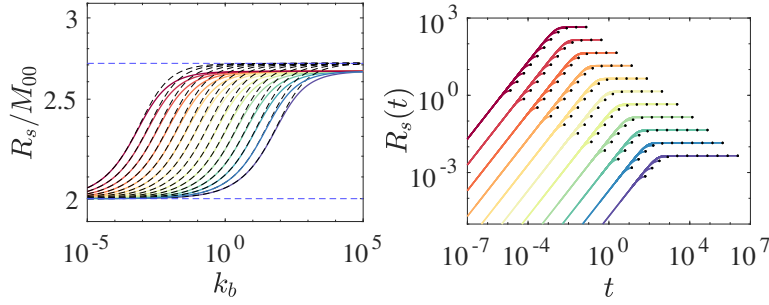

Fig. S1: ODE model simulations with constant source rate  $S_{10}$  increasing by factors of 10 from  $10^{-5}$  (deep blue curve) to  $10^5$  (deep red curves) and branching rates  $k_b$ . (a) Average functionality  $f^A = \frac{R_s}{M_{00}}$  at  $t_{gel}$ . Colored curves show results from numerical solutions of Eqs. 2.10-2.14. Dashed black curves show approximate  $f^A$  calculated from Eq. 3.11 using the numerical solution  $r_{ss}$  of Eq. 3.5. (b) Plots of  $R_s(t)$  vs.  $t$ .  $k_b$  increases by factors of 10 from  $10^{-5}$  to  $10^5$  with the right-most point of each curve corresponding to  $k_b = 10^{-5}$ .

996 Since we are interested in events before gel time,  $R_s(t) = R(t)$ . Eqs. S1.9 and S1.11 are  
 997 the same as Eqs. 2.10 and 2.15 in the main text, respectively. The gelation indicator  
 998 variable  $U(t)$  in the main text is obtained from  $Y(t)$  by a Riccati transformation  
 999  $Y = -\frac{1}{aU} \frac{dU}{dt}$  where  $a = k_l + k_b R$  [9]. The key point is that  $U(t) \rightarrow 0$  if and only  
 1000 if  $Y(t) \rightarrow \infty$ , so the latter is also an indication of gelation. The relevant initial  
 1001 conditions are  $R(0) = R_0$ ,  $Y(0) = 0$ , and  $M_{00}(0) = \frac{R_0}{2}$ .

1002 Since Eq. S1.9 implies that  $R(t)$  is a monotone decreasing of  $t$ , we can use  $R$  as  
 1003 the independent variable and from Eqs. S1.9-S1.11 we obtain

$$1004 \quad (S1.12) \quad \frac{dY}{dR} = -\frac{k_l Y^2 + k_b R \left( \frac{1}{2} R^2 + RY + Y^2 \right)}{k_l R^2 + \frac{k_b}{2} R^3}$$

1005 and

$$1006 \quad (S1.13) \quad \frac{dM_{00}}{dR} = \frac{\frac{k_l}{2} R^2 + \frac{k_b}{3} R^3}{k_l R^2 + \frac{k_b}{2} R^3}.$$

1007 The solution of Eq. S1.12 is

$$1008 \quad (S1.14) \quad Y(R) = -R \frac{k_l \ln(k_b R + k_l) - \frac{k_b}{2} R + C}{k_l \ln(k_b R + k_l) - k_b R + C}.$$

1009 Choosing the constant  $C$  so that  $Y(R_0) = 0$  yields

$$1010 \quad (S1.15) \quad Y(R) = -R \frac{k_l \ln \left( \frac{k_b R + k_l}{k_b R_0 + k_l} \right) - \frac{k_b}{2} R + \frac{k_b}{2} R_0}{k_l \ln \left( \frac{k_b R + k_l}{k_b R_0 + k_l} \right) - k_b R + \frac{k_b}{2} R_0}.$$

1011 Blow-up of  $Y(R)$  occurs for  $R = R^*$  for which the denominator is 0, i.e.

$$1012 \quad (S1.16) \quad k_l \ln \left( \frac{k_l R^* + k_b}{k_l R_0 + k_b} \right) - k_b R^* + \frac{k_b}{2} R_0 = 0.$$

1013 Eq. S1.16 implies that  $R(t_{gel}) = R^*$ . To determine  $t_{gel}$ , we find the solution of Eq.  
 1014 S1.9 that satisfies the condition  $R(0) = R_0$  and obtain

$$1015 \quad (S1.17) \quad t_{gel} = \frac{1}{k_l R^*} - \frac{1}{k_l R_0} - \frac{k_b}{2k_l^2} \ln \left( \frac{(k_b R^* + k_l) R_0}{(k_b R_0 + k_l) R^*} \right).$$

1016 To find  $M_{00}(t_{gel})$ , we begin by solving Eq. S1.13 and imposing the condition  $M_{00}(R_0)$   
 1017  $= \frac{R_0}{2}$  to obtain

$$1018 \quad (S1.18) \quad M_{00}(R) = \frac{2R}{3} - \frac{R_0}{6} - \frac{k_l}{3k_b} \ln \left( \frac{k_b R + k_l}{k_b R_0 + k_l} \right).$$

1019 Since at gel time  $R = R^*$ , the last equation implies that

$$1020 \quad (S1.19) \quad M_{00}(t_{gel}) = \frac{2R^*}{3} - \frac{R_0}{6} - \frac{k_l}{3k_b} \ln \left( \frac{k_b R^* + k_l}{k_b R_0 + k_l} \right).$$

1021 Using Eq. S1.16, this becomes

$$1022 \quad (S1.20) \quad M_{00}(t_{gel}) = \frac{R^*}{3} = \frac{R(t_{gel})}{3}.$$

### S1.8. Additional Results - Variations in Source Rate $\lambda$ .

1023

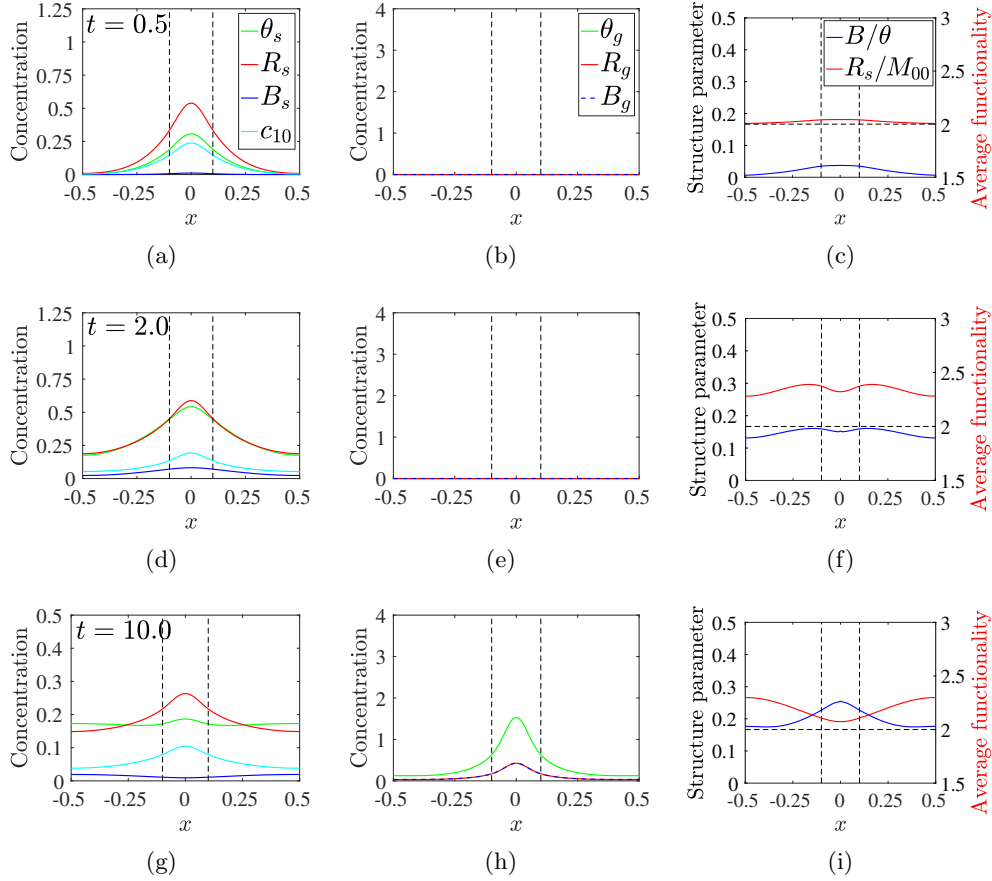

Fig. S2: PDE model simulations with source rate  $S_{10}(x, t)$  given in Eq. 3.12 with  $m_0 = 8$ ,  $k_b = 4$ ,  $D = 0.04$ ,  $\lambda = 1/4$ . Snapshots of sol variables (left) gel variables (middle), and structure variables (right) at the times indicated for each row. Note change in vertical scale in left column. Black dashed vertical lines show extent of source's spatial support.

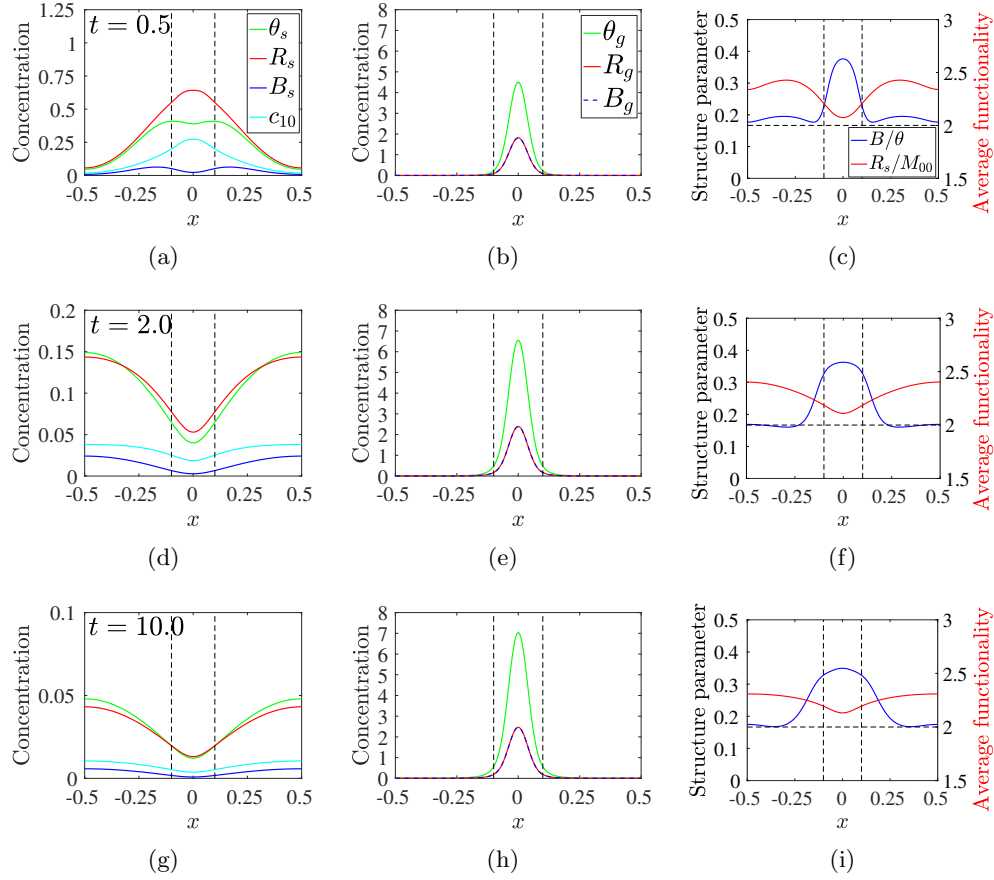

Fig. S3: PDE model simulations with source rate  $S_{10}(x, t)$  given in Eq. 3.12 with  $m_0 = 8$ ,  $k_b = 4$ ,  $D = 0.04$ ,  $\lambda = 4.0$ . Snapshots of sol variables (left) gel variables (middle), and structure variables (right) at the times indicated for each row. Note change in vertical scale in left column. Black dashed vertical lines show extent of source's spatial support.



### S1.9. Additional Results - Variations in Branching Rate $k_b$ .

1024

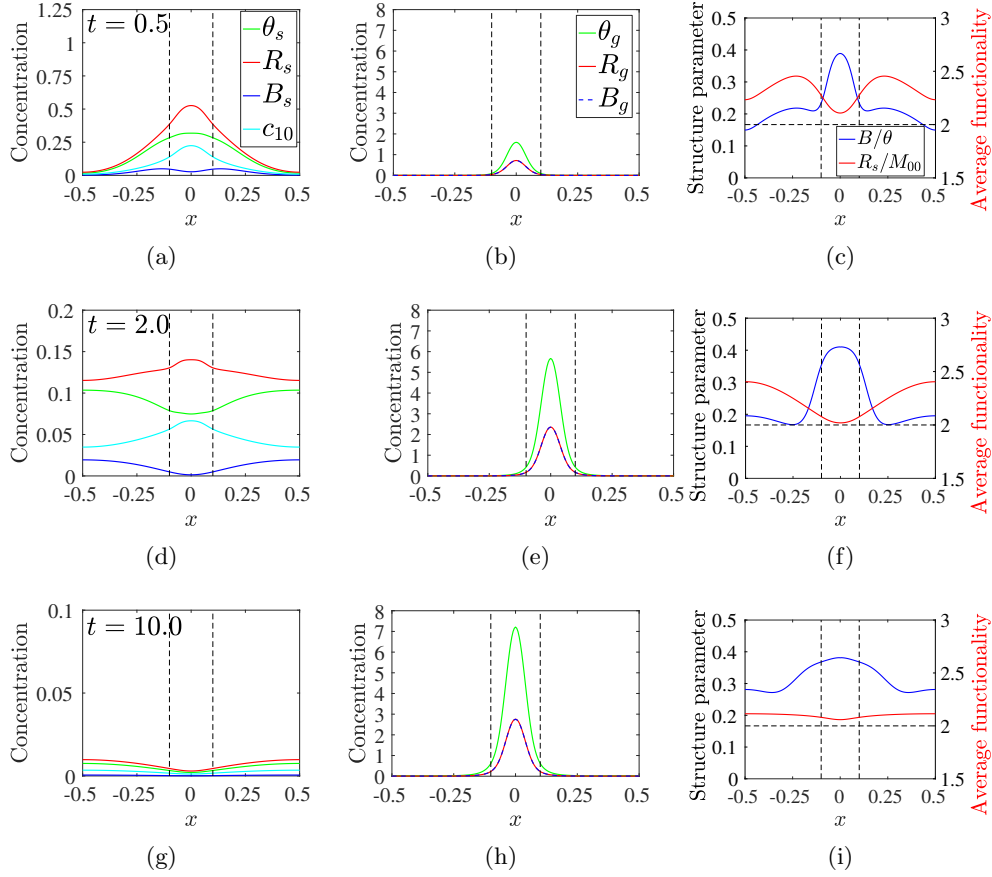

Fig. S4: PDE model simulations with source rate  $S_{10}(x, t)$  given in Eq. (3.12) with  $m_0 = 8$ ,  $\mathbf{k}_b = \mathbf{16}$ ,  $\lambda = 1$ ,  $D = 0.04$ . Snapshots of sol variables (left) gel variables (middle), and structure variables (right) at the times indicated for each row. Note change in vertical scale in left column. Black dashed vertical lines show extent of source's spatial support.

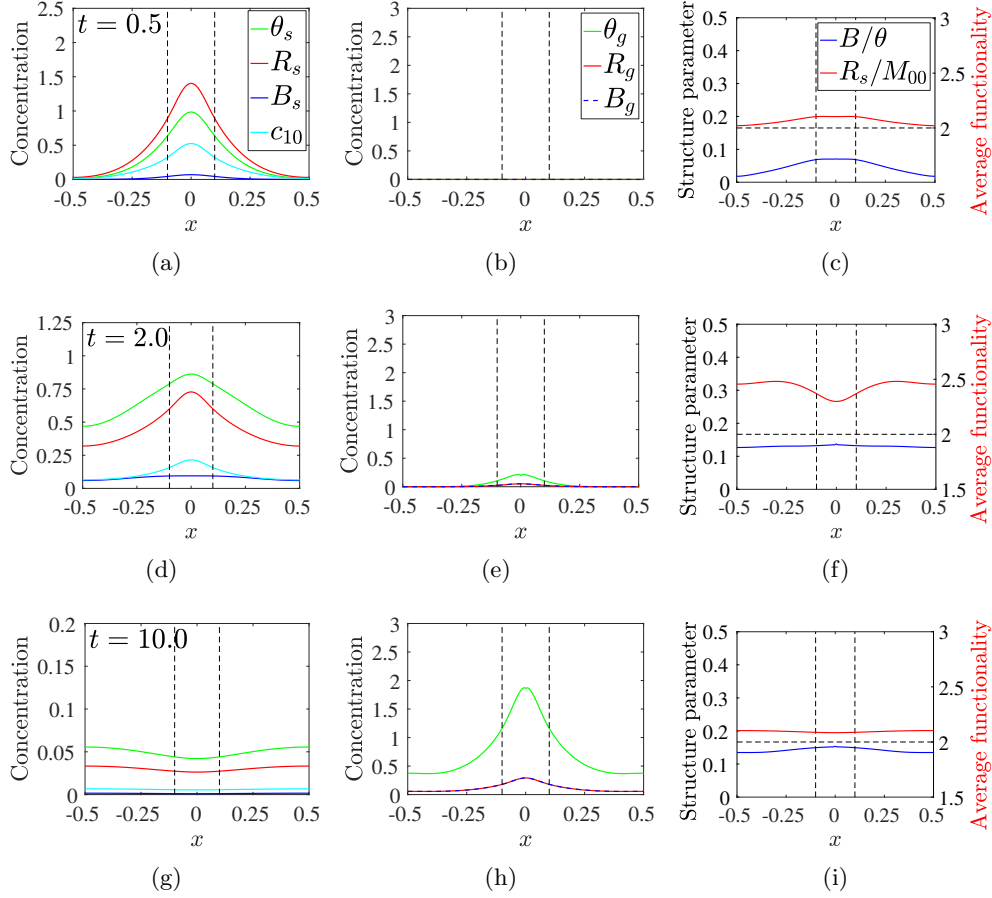

Fig. S5: PDE model simulations with source rate  $S_{10}(x, t)$  given in Eq. 3.12 with  $m_0 = 8$ ,  $\mathbf{k}_b = \mathbf{1}$ ,  $\lambda = 1$ ,  $D = 0.04$ . Snapshots of sol variables (left) gel variables (middle), and structure variables (right) at the times indicated for each row. Note change in vertical scale in left column. Black dashed vertical lines show extent of source's spatial support.

### S1.10. Additional Results - Variations in Diffusivity $D$ and $D_1$ .

1025

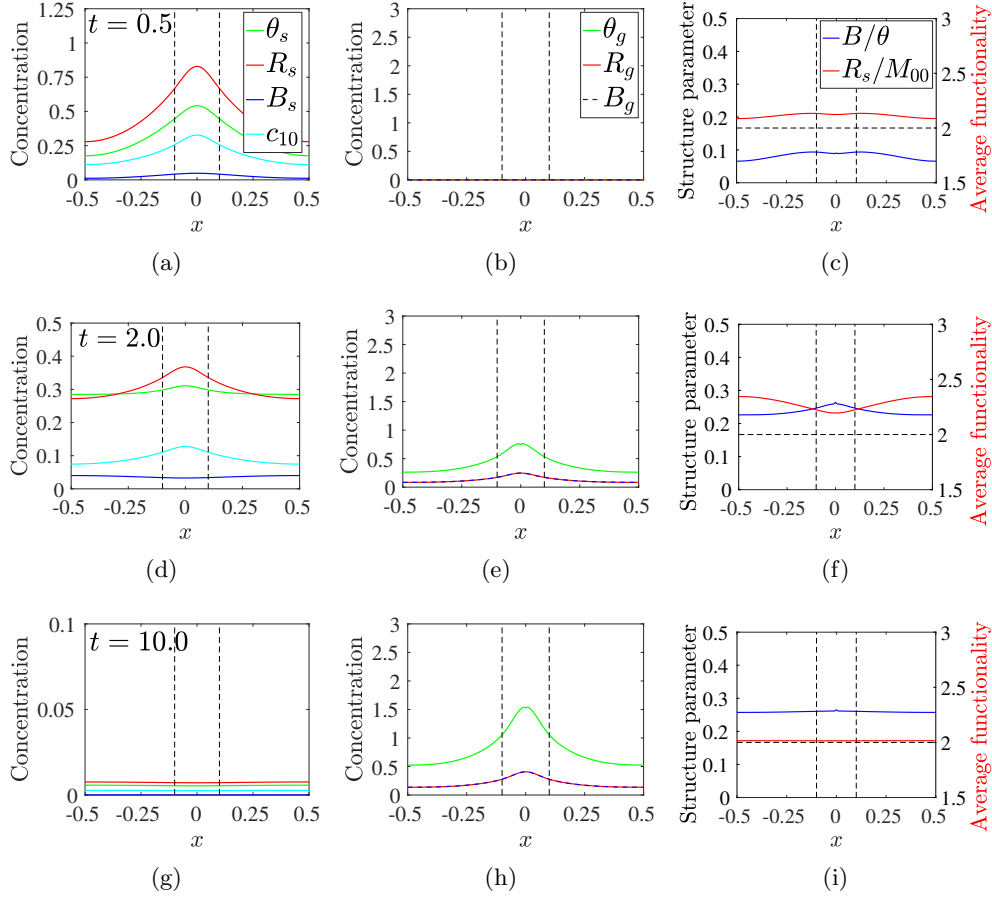

Fig. S6: PDE model simulations with source rate  $S_{10}(x, t)$  given in Eq. (3.12) with  $m_0 = 8$ ,  $k_b = 4$ ,  $\lambda = 1$ ,  $\mathbf{D} = \mathbf{0.16}$ . Snapshots of sol variables (left) gel variables (middle), and structure variables (right) at the times indicated for each row. Note change in vertical scale in left column. Black dashed vertical lines show extent of source's spatial support.

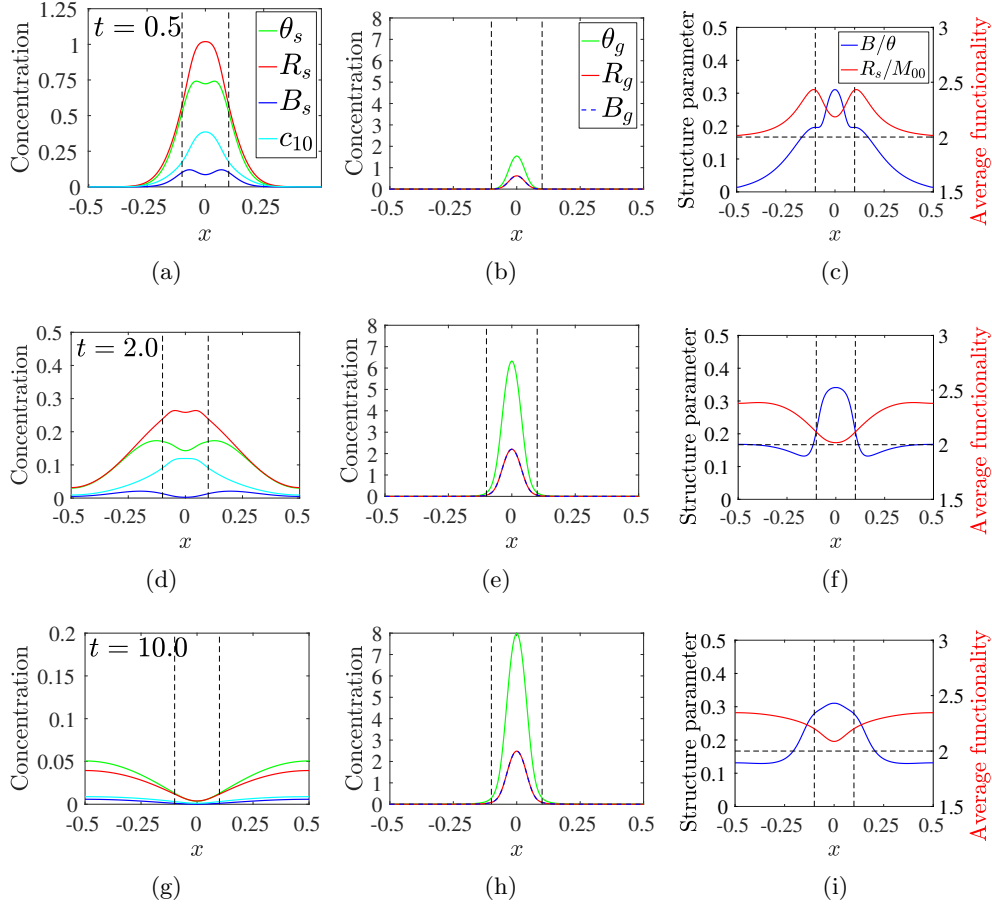

Fig. S7: PDE model simulations with source rate  $S_{10}(x, t)$  given in Eq. 3.12 with  $m_0 = 8$ ,  $k_b = 4$ ,  $\lambda = 1$ ,  $\mathbf{D} = \mathbf{0.01}$ . Snapshots of sol variables (left) gel variables (middle), and structure variables (right) at the times indicated for each row. Note change in vertical scale in left column. Black dashed vertical lines show extent of source's spatial support.

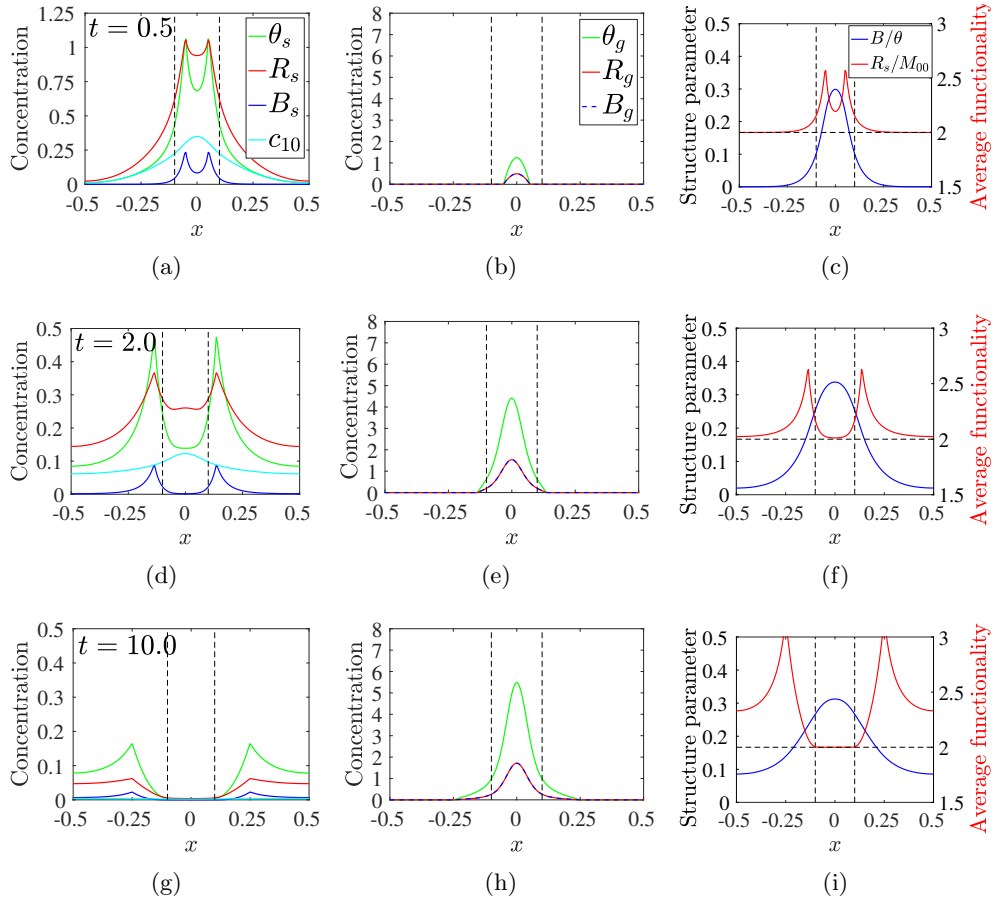

Fig. S8: PDE model simulations with source rate  $S_{10}(x, t)$  given in Eq. 3.12 with  $m_0 = 8$ ,  $k_b = 4$ ,  $\lambda = 1$ ,  $\mathbf{D} = \mathbf{0}$ ,  $\mathbf{D}_1 = \mathbf{0.04}$ . Snapshots of sol variables (left) gel variables (middle), and structure variables (right) at the times indicated for each row. Note change in vertical scale in left column. Black dashed vertical lines show extent of source's spatial support.

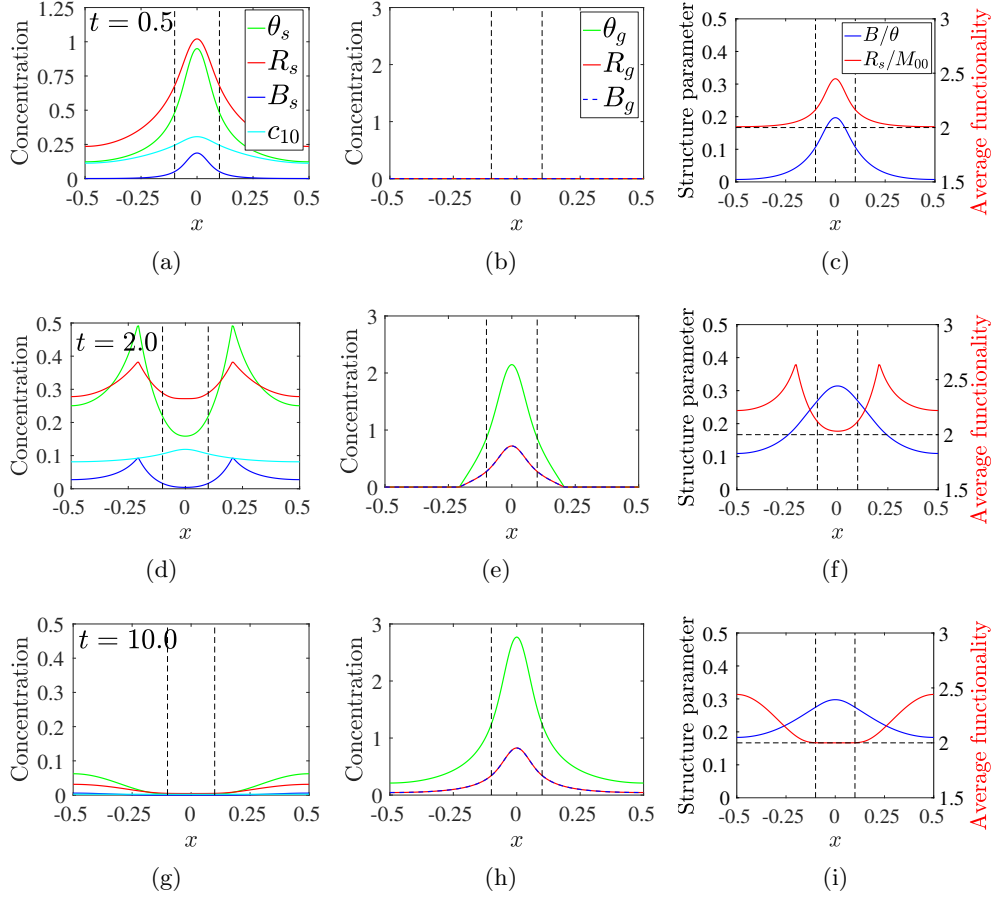

Fig. S9: PDE model simulations with source rate  $S_{10}(x, t)$  given in Eq. 3.12 with  $m_0 = 8$ ,  $k_b = 4$ ,  $\lambda = 1$ ,  $\mathbf{D} = \mathbf{0}$ ,  $\mathbf{D}_1 = \mathbf{0.16}$ . Snapshots of sol variables (left) gel variables (middle), and structure variables (right) at the times indicated for each row. Note change in vertical scale in left column. Black dashed vertical lines show extent of source's spatial support.
